# Supplementary material
Source: MDPI journal article supplement (https://www.mdpi.com/2073-4433/11/5/534)
Supplement: s1 [file s1]

# Ozone Trends in the United Kingdom over the Last 30 Years

Florencia M. R. Diaz <sup>1,2</sup>, M. Anwar H. Khan <sup>1</sup>, Beth M. A. Shallcross <sup>3</sup>, Esther D. G. Shallcross <sup>3</sup>, Ulrich Vogt <sup>2</sup> and Dudley E. Shallcross <sup>1,\*</sup>

<sup>1</sup> School of Chemistry, University of Bristol, Bristol BS8 1TS, UK; flor.ramdi@gmail.com (F.M.R.D.); anwar.khan@bristol.ac.uk (M.A.H.K.)

<sup>2</sup> Institute of Combustion and Power Plant Technology; University of Stuttgart, D-70569 Stuttgart, Germany; ulrich.vogt@ifk.uni-stuttgart.de

<sup>3</sup> School of Pharmacy, The University of Manchester, Oxford Road, Manchester M13 9PL, UK; bma.shallcross@gmail.com (B.M.A.S.); esther.shallcross@gmail.com (E.D.G.S.)

\* Correspondence: d.e.shallcross@bris.ac.uk; Tel.: +44-117-9287796

**Table S1.** The annual average ozone maximum and the trend of maximum ozone and average ozone for the period of 1992–2019.

| Sites                  | Average Ozone Maximum (ppb) | Trend of Ozone Maximum ppb/yr | Trend of Average Ozone ppb/yr |
|------------------------|-----------------------------|-------------------------------|-------------------------------|
| <b>Rural Sites</b>     |                             |                               |                               |
| Aston Hill             | 83.2                        | −1.00 (1.2), $p = 0.04$       | 0.09 (0.3), $p = 0.001$       |
| Bottesford*            | 87.0                        | −1.16 (1.3), $p < 0.001$      | 0.30 (1.3), $p < 0.001$       |
| Bush Estate**          | 68.5                        | −0.46 (0.7), $p = 0.003$      | 0.12 (0.4), $p = 0.07$        |
| Eskdatemuir            | 76.4                        | −0.67 (0.9), $p = 0.001$      | 0.16 (0.6), $p = 0.02$        |
| Glazebury              | 80.8                        | −0.93 (1.2), $p < 0.001$      | 0.24 (1.2), $p = 0.002$       |
| Harwell*               | 91.6                        | −1.65 (1.8), $p = 0.05$       | 0.09 (0.4), $p < 0.001$       |
| High Muffles           | 85.6                        | −0.91 (1.1), $p = 0.002$      | 0.15 (0.5), $p = 0.001$       |
| Ladybower              | 82.6                        | −1.46 (1.8), $p = 0.01$       | 0.10 (0.4), $p < 0.001$       |
| Lough Navar            | 70.8                        | −0.18 (0.3), $p = 0.005$      | 0.08 (0.3), $p = 0.04$        |
| Lullington Heath       | 92.2                        | −1.74 (1.9), $p = 0.03$       | 0.07 (0.2), $p < 0.001$       |
| Sibton                 | 97.8                        | −1.08 (1.1), $p = 0.01$       | 0.10 (0.4), $p = 0.001$       |
| Strathvaich            | 72.4                        | −0.31 (0.4), $p = 0.05$       | −0.01 (0.0), $p = 0.08$       |
| Yaner Wood             | 88.8                        | −0.99 (1.1), $p = 0.008$      | 0.11 (0.4), $p = 0.005$       |
| <b>Urban Sites</b>     |                             |                               |                               |
| Belfast Centre         | 65.0                        | −0.32 (0.5), $p < 0.001$      | 0.15 (0.7), $p = 0.01$        |
| Birmingham Centre***   | 77.0                        | −0.80 (1.0), $p = 0.02$       | 0.26 (1.4), $p = 0.005$       |
| Cardiff Centre         | 81.7                        | −1.02 (1.2), $p < 0.001$      | 0.27 (1.4), $p = 0.001$       |
| Leeds Centre****       | 71.1                        | −0.42 (0.6), $p < 0.001$      | 0.26 (1.5), $p = 0.009$       |
| London Bloomsbury      | 74.1                        | −0.92 (1.2), $p < 0.001$      | 0.25 (2.1), $p = 0.001$       |
| Southampton Centre**** | 72.2                        | −0.64 (0.9), $p < 0.001$      | 0.16 (0.9), $p = 0.009$       |

Note: The percentage trend of maximum ozone and average ozone per year has been shown in parenthesis. \*data coverage from 1992 to 2016, \*\*data coverage from 1999 to 2019, \*\*\*data coverage from 1992 to 2009, \*\*\*\*data coverage from 1994 to 2019.

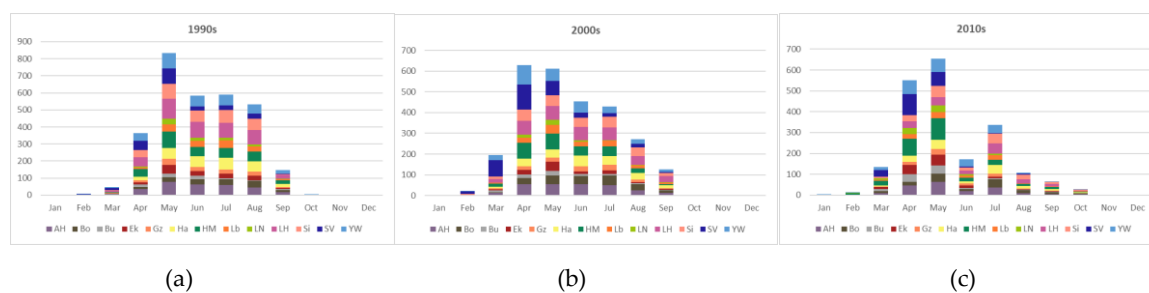

**Figure S1.** Monthly ozone exceedances in rural sites for last three decades, (a) 1990s, (b) 2000s and (c) 2010s. Total exceedance is calculated as the total number of hours at ozone concentration  $\geq 50$  ppbv for each month in a year and then yearly averaged for each decade.

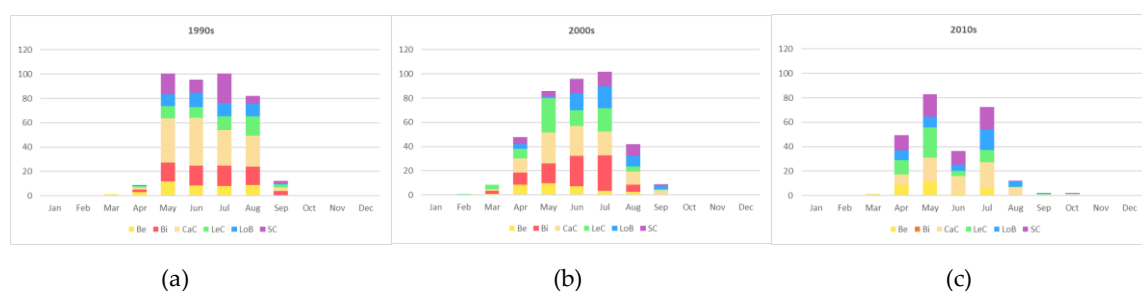

**Figure S2.** Monthly ozone exceedances in urban sites for last three decades, (a) 1990s, (b) 2000s and (c) 2010s. Total exceedance is calculated as the total number of hours at ozone concentration  $\geq 50$  ppbv for each month in a year and then yearly averaged for each decade.

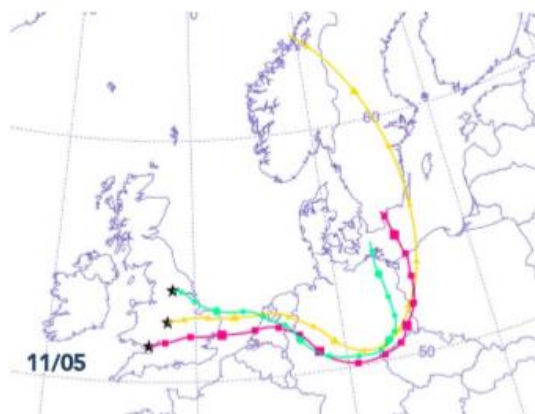

**Figure S3.** Trajectories arriving in Birmingham Centre (Bi), Cardiff Centre (CaC) and Leeds Centre (LeC) at 4 pm (local time) on 11 May 2008.

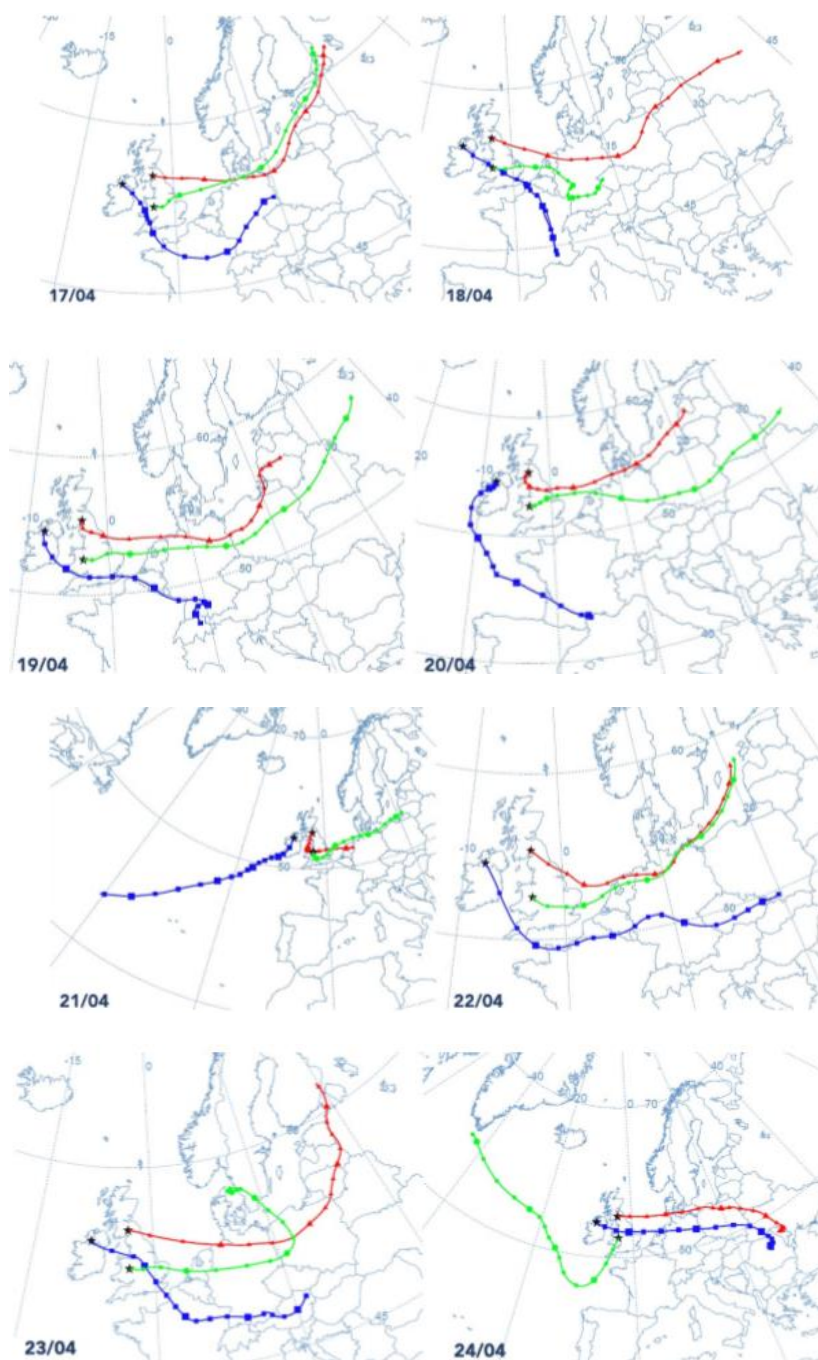

**Figure S4.** Trajectories arriving in Eskdatemuir (Ek), Aston Hill (AH) and Lough Navar (LN) at 4 pm (local time) for the period of 17 April to 24 April 2019.
